# Supplementary material
Source: bioRxiv or medRxiv preprint supplement (https://medrxiv.org/highwire/filestream/73189/field_highwire_adjunct_files/2/2020.03.05.20023937-3.pdf)
Supplement: Supplementary file [file 2020.03.05.20023937-3.pdf]

- SUPPLEMENTARY DIGITAL CONTENT -  
PINNA-IMITATING MICROPHONE DIRECTIVITY IMPROVES SOUND  
LOCALIZATION AND DISCRIMINATION IN BILATERAL COCHLEAR IMPLANT  
USERS

Fischer T.<sup>1,2</sup>, Schmid C.<sup>1</sup>, Mantokoudis J.<sup>1</sup>, Kompis M.<sup>1</sup>, Caversaccio M.<sup>1,2</sup>, and Wimmer W.<sup>1,2</sup>

<sup>1</sup>Department of ENT, Head and Neck Surgery, Inselspital, Bern University Hospital, University of  
Bern, Bern 3008, Switzerland

<sup>2</sup>Hearing Research Laboratory, ARTORG Center for Biomedical Engineering Research, University  
of Bern, Bern 3008, Switzerland

**ABSTRACT**

The following material refers to the publication "Pinna-Imitating Microphone Directivity Improves Sound Localization and Discrimination in Bilateral Cochlear Implant Users". It shows alternative and partly more detailed forms of presentation of the data.

## 1 Static sound source localization

Table 1: Influence of front-back confusions (FBCs) on the root mean square error ( $\text{RMSE}_{\text{LOC}}$ ) in the static sound source localization test for each subject. Shown is the data for the omnidirectional microphone setting (OMNI) in degree angle.

| Subject | $\text{RMSE}_{\text{LOC}}$ | $\text{RMSE}_{\text{LOC}}$ (with FBCs) |
|---------|----------------------------|----------------------------------------|
| CI01    | 34.0                       | 80.5                                   |
| CI02    | 21.5                       | 60.7                                   |
| CI03    | 20.7                       | 66.7                                   |
| CI04    | 30.4                       | 76.6                                   |
| CI05    | 33.2                       | 62.9                                   |
| CI06    | 32.2                       | 64.3                                   |
| CI07    | 41.2                       | 60.3                                   |
| CI08    | 38.0                       | 59.6                                   |
| CI09    | 39.0                       | 55.2                                   |
| CI10    | 30.1                       | 68.5                                   |
| CI11    | 30.6                       | 57.9                                   |
| CI12    | 20.8                       | 65.3                                   |
| Mean    | 31.0                       | 64.9                                   |
| SD      | 7.0                        | 7.4                                    |
| Median  | 31.4                       | 63.6                                   |

Table 2: Influence of front-back confusions (FBCs) on the root mean square error ( $\text{RMSE}_{\text{LOC}}$ ) in the static sound source localization test for each azimuth. Shown is the data for the omnidirectional microphone setting (OMNI) in degree angle.

| Azimuth | <b>FBCS excluded</b> |      |        | <b>FBCS included</b> |      |        | <b><math>\Delta</math> (included-excluded)</b> |      |        |
|---------|----------------------|------|--------|----------------------|------|--------|------------------------------------------------|------|--------|
|         | Mean                 | SD   | Median | Mean                 | SD   | Median | Mean                                           | SD   | Median |
| 0°      | 27.8                 | 26.5 | 19.0   | 63.4                 | 55.3 | 54.6   | 35.6                                           | 28.8 | 35.6   |
| 30°     | 37.3                 | 21.7 | 43.0   | 62.5                 | 32.5 | 71.0   | 25.2                                           | 10.8 | 28.0   |
| 60°     | 31.0                 | 20.3 | 27.5   | 48.2                 | 16.9 | 49.2   | 17.2                                           | -3.4 | 21.7   |
| 90°     | 21.2                 | 13.8 | 17.8   | 21.2                 | 13.8 | 17.8   | 0.0                                            | 0.0  | 0.0    |
| 120°    | 16.8                 | 9.0  | 17.7   | 26.2                 | 15.4 | 21.6   | 9.4                                            | 6.4  | 3.9    |
| 150°    | 41.6                 | 18.0 | 43.8   | 60.6                 | 22.5 | 56.9   | 19.0                                           | 4.5  | 13.1   |
| 180°    | 40.6                 | 27.1 | 49.4   | 120.9                | 43.2 | 132.9  | 80.3                                           | 16.1 | 83.5   |
| 210°    | 43.9                 | 26.7 | 47.1   | 77.3                 | 31.7 | 79.7   | 33.4                                           | 5.0  | 32.6   |
| 240°    | 14.7                 | 8.8  | 15.8   | 30.2                 | 14.3 | 23.1   | 15.5                                           | 5.5  | 7.3    |
| 270°    | 25.0                 | 9.9  | 24.1   | 25.0                 | 9.9  | 24.1   | 0.0                                            | 0.0  | 0.0    |
| 300°    | 20.1                 | 12.5 | 22.2   | 43.1                 | 13.8 | 42.1   | 23.0                                           | 1.3  | 19.9   |
| 330°    | 29.5                 | 18.1 | 28.9   | 54.0                 | 36.0 | 45.3   | 24.5                                           | 17.9 | 16.4   |

Table 3: Influence of front-back confusions (FBCs) on the root mean square error ( $RMSE_{LOC}$ ) in the static sound source localization test for each subject. Shown is the data for the pinna-imitating microphone setting (PI) in degree angle.

| Subject | $RMSE_{LOC}$ | $RMSE_{LOC}$ (with FBCs) |
|---------|--------------|--------------------------|
| CI01    | 20.4         | 31.6                     |
| CI02    | 20.1         | 50.6                     |
| CI03    | 28.0         | 60.3                     |
| CI04    | 37.7         | 68.8                     |
| CI05    | 32.1         | 57.7                     |
| CI06    | 20.9         | 36.7                     |
| CI07    | 29.3         | 56.0                     |
| CI08    | 38.4         | 58.4                     |
| CI09    | 30.7         | 44.1                     |
| CI10    | 24.4         | 62.7                     |
| CI11    | 32.9         | 64.8                     |
| CI12    | 23.7         | 34.2                     |
| Mean    | 36.9         | 52.2                     |
| SD      | 13.4         | 12.6                     |
| Median  | 39.6         | 56.9                     |

Table 4: Influence of front-back confusions (FBCs) on the root mean square error ( $RMSE_{LOC}$ ) in the static sound source localization test for each azimuth. Shown is the data for the pinna-imitating microphone setting (PI) in degree angle.

| Azimuth | <b>FBCS excluded</b> |      |        | <b>FBCS included</b> |      |        | <b><math>\Delta</math> (included-excluded)</b> |      |        |
|---------|----------------------|------|--------|----------------------|------|--------|------------------------------------------------|------|--------|
|         | Mean                 | SD   | Median | Mean                 | SD   | Median | Mean                                           | SD   | Median |
| 0°      | 23.5                 | 24.1 | 12.1   | 44.5                 | 48.6 | 26.6   | 21.0                                           | 24.5 | 14.5   |
| 30°     | 39.0                 | 15.2 | 38.9   | 47.4                 | 19.9 | 41.0   | 8.4                                            | 4.7  | 2.1    |
| 60°     | 15.1                 | 8.8  | 15.8   | 34.5                 | 16.9 | 35.9   | 19.4                                           | 8.1  | 20.1   |
| 90°     | 22.4                 | 8.6  | 22.0   | 22.4                 | 8.6  | 22.0   | 0.0                                            | 0.0  | 0.0    |
| 120°    | 12.4                 | 7.6  | 12.7   | 22.3                 | 9.5  | 23.8   | 9.9                                            | 1.9  | 11.1   |
| 150°    | 30.8                 | 17.5 | 28.6   | 55.2                 | 27.6 | 53.5   | 24.4                                           | 10.1 | 24.9   |
| 180°    | 31.8                 | 23.4 | 31.4   | 84.4                 | 57.2 | 86.0   | 52.6                                           | 33.8 | 54.6   |
| 210°    | 36.2                 | 18.2 | 29.7   | 58.7                 | 29.2 | 58.3   | 22.5                                           | 11.0 | 28.6   |
| 240°    | 12.9                 | 9.1  | 12.1   | 33.5                 | 16.5 | 30.7   | 20.6                                           | 7.4  | 18.6   |
| 270°    | 20.6                 | 12.8 | 21.6   | 20.6                 | 12.8 | 21.6   | 0.0                                            | 0.0  | 0.0    |
| 300°    | 17.8                 | 8.3  | 19.3   | 35.2                 | 16.1 | 36.7   | 17.4                                           | 7.8  | 17.4   |
| 330°    | 34.3                 | 12.4 | 36.8   | 53.0                 | 28.0 | 57.7   | 18.7                                           | 15.6 | 20.9   |

Table 5: A separate analysis of front-back and back-front confusions in the static sound source localization test. Shown is the data for the omnidirectional microphone setting (OMNI).

| Subject | Back-Front |           |          | Front-Back |           |          |
|---------|------------|-----------|----------|------------|-----------|----------|
|         | Occurences | Score (%) | Rate (%) | Occurences | Score (%) | Rate (%) |
| CI01    | 12         | 29.5      | 40       | 6          | 11.8      | 20.0     |
| CI02    | 7          | 11.4      | 23.3     | 7          | 8.4       | 23.3     |
| CI03    | 12         | 24        | 40       | 4          | 4.9       | 13.3     |
| CI04    | 0          | 0.0       | 0        | 15         | 39.9      | 50.0     |
| CI05    | 5          | 4.4       | 16.7     | 9          | 18.3      | 30.0     |
| CI06    | 6          | 11.3      | 20       | 7          | 15.6      | 23.3     |
| CI07    | 3          | 5.1       | 10       | 9          | 15.0      | 30.0     |
| CI08    | 8          | 7.2       | 26.7     | 6          | 11.0      | 20.0     |
| CI09    | 3          | 0.7       | 10       | 7          | 14.7      | 23.3     |
| CI10    | 7          | 15.2      | 23.3     | 8          | 16.1      | 26.7     |
| CI11    | 9          | 16.4      | 30       | 3          | 7.0       | 10.0     |
| CI12    | 14         | 27.7      | 46.7     | 1          | 0.1       | 3.3      |
| Mean    | 7          | 12.7      | 23.9     | 7          | 13.6      | 22.8     |
| SD      | 4          | 10.1      | 13.8     | 4          | 9.8       | 11.7     |
| Median  | 7          | 11.4      | 23.3     | 7          | 13.3      | 23.3     |

Table 6: A separate analysis of front-back and back-front confusions in the static sound source localization test. Shown is the data for the pinna-imitating microphone setting (PI).

| Subject | Back-Front |           |          | Front-Back |           |          |
|---------|------------|-----------|----------|------------|-----------|----------|
|         | Occurences | Score (%) | Rate (%) | Occurences | Score (%) | Rate (%) |
| CI01    | 3          | 6.4       | 10.0     | 0          | 0.0       | 0.0      |
| CI02    | 4          | 6.7       | 13.3     | 3          | 5.4       | 10.0     |
| CI03    | 8          | 16.8      | 26.7     | 2          | 2.6       | 6.7      |
| CI04    | 0          | 0.0       | 0.0      | 14         | 34.9      | 46.7     |
| CI05    | 10         | 16.6      | 33.3     | 3          | 6.8       | 10.0     |
| CI06    | 3          | 5.2       | 10.0     | 4          | 8.3       | 13.3     |
| CI07    | 8          | 14.5      | 26.7     | 4          | 9.5       | 13.3     |
| CI08    | 5          | 2.1       | 16.7     | 10         | 13.2      | 33.3     |
| CI09    | 1          | 0.8       | 3.3      | 6          | 6.9       | 20.0     |
| CI10    | 10         | 19.0      | 33.3     | 5          | 5.9       | 16.7     |
| CI11    | 12         | 21.7      | 40.0     | 4          | 6.2       | 13.3     |
| CI12    | 6          | 5.4       | 20.0     | 2          | 1.9       | 6.7      |
| Mean    | 6          | 9.6       | 19.4     | 5          | 8.5       | 15.8     |
| SD      | 4          | 7.6       | 12.7     | 4          | 9.0       | 12.7     |
| Median  | 6          | 6.6       | 18.4     | 4          | 6.5       | 13.3     |

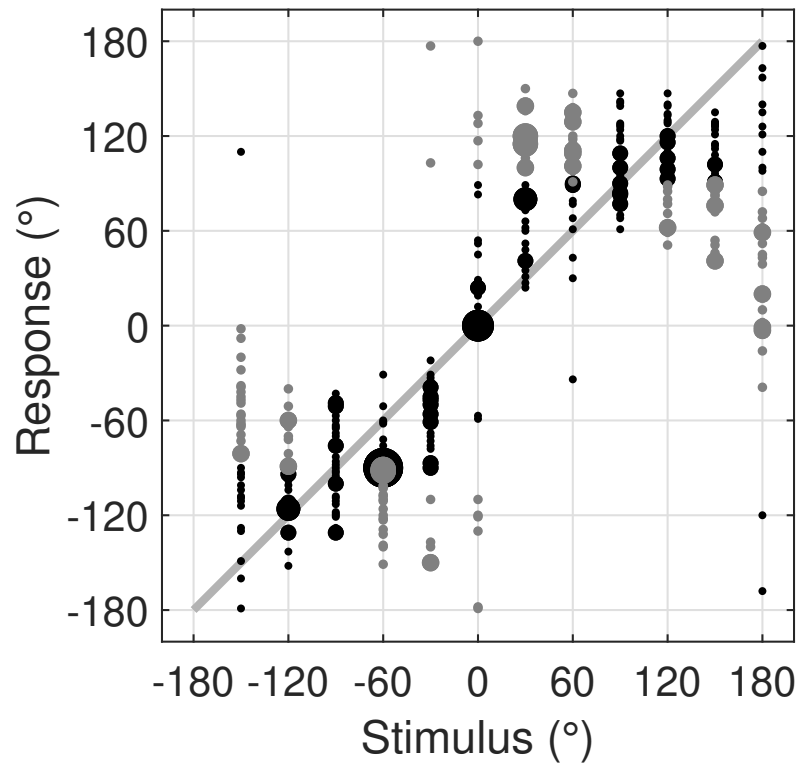

Figure 1: The plot shows the distribution of indicated response positions for given stimuli positions with the omni directional microphone setting (OMNI). The responses on the diagonal indicate a perfect localization result. Regular localization errors are represented by black dots and front-back confusion (FBC) errors by grey dots.

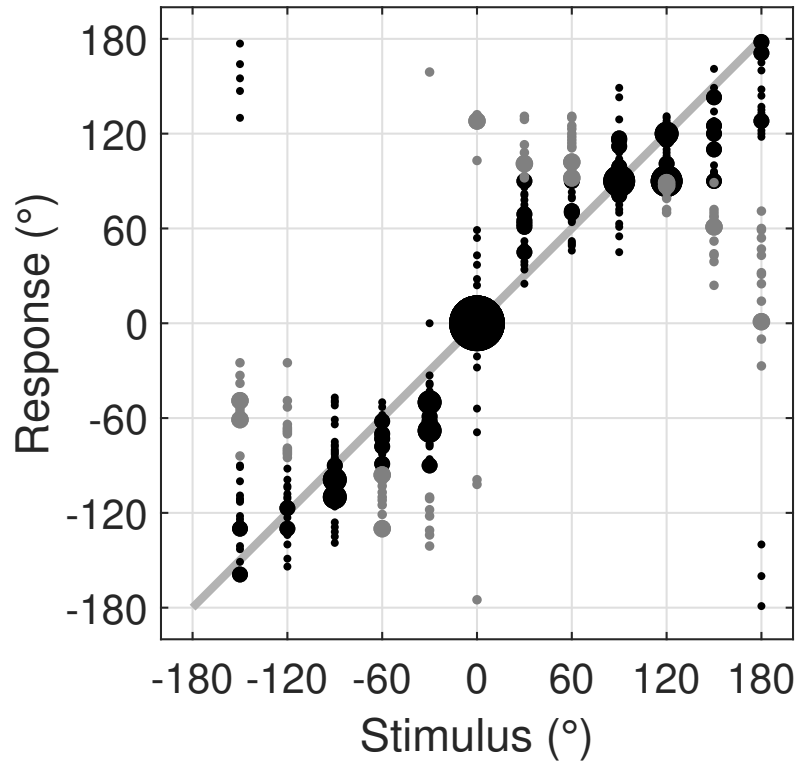

Figure 2: The plot shows the distribution of indicated response positions for given stimuli positions with the pinna-imitating microphone setting (PI). The responses on the diagonal indicate a perfect localization result. Regular localization errors are represented by black dots and front-back confusion (FBC) errors by grey dots.

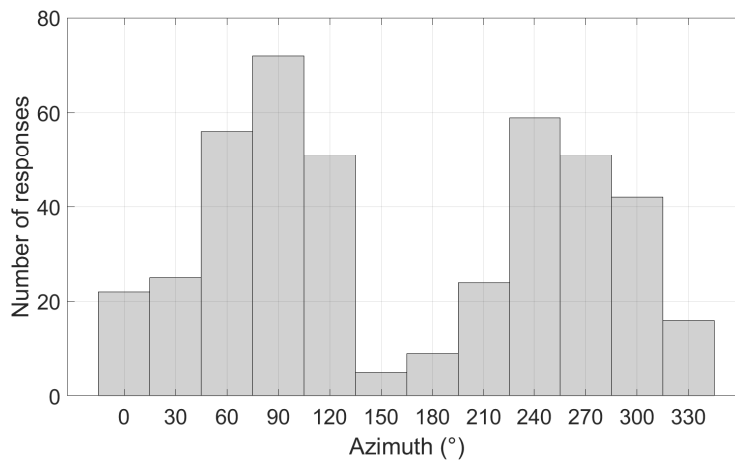

Figure 3: Histogram for the distribution of the responses with the omni directional microphone setting (OMNI) for the static sound source localization tests. The responses are binned to the azimuths of the 12 possible stimuli directions. The front-back confusions (FBCs) are included in the error calculations.

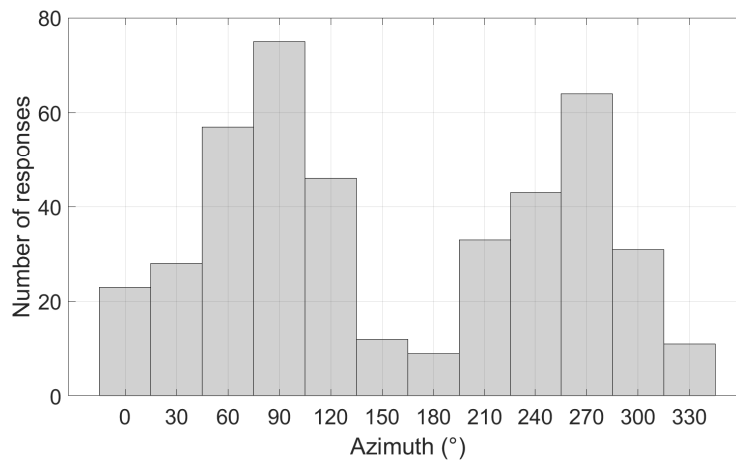

Figure 4: Histogram for the distribution of the responses with the pinna-imitating microphone setting (PI) for the static sound source localization tests. The responses are binned to the azimuths of the 12 possible stimuli directions. The front-back confusions (FBCs) are included in the error calculations.

## 2 Minimum audible angle

Table 7: Minimum audible angle (MAA) performance averaged across all subjects with respect to the tested azimuth. The data compares the performance of the pinna-imitating microphone setting (PI) with the omnidirectional microphone setting (OMNI).

| Azimuth | OMNI |      |        | NM   |      |        | $\Delta$ (OMNI-NM) |      |        |
|---------|------|------|--------|------|------|--------|--------------------|------|--------|
|         | Mean | SD   | Median | Mean | SD   | Median | Mean               | SD   | Median |
| 0°      | 4.3  | 2.7  | 3.4    | 4.1  | 2.6  | 3.6    | 0.2                | 0.1  | -0.2   |
| 45°     | 13.6 | 10.0 | 13.8   | 16.8 | 11.2 | 11.5   | -3.3               | -1.2 | 2.3    |
| 90°     | 71.9 | 27.0 | 85.9   | 34.7 | 21.2 | 30.5   | 37.2               | 5.9  | 55.4   |
| 135°    | 28.4 | 18.8 | 21.3   | 30.4 | 10.8 | 32.6   | -2.0               | 8.0  | -11.3  |
| 180°    | 7.0  | 5.0  | 5.9    | 8.4  | 9.6  | 6.3    | -1.4               | -4.6 | -0.5   |
| 225°    | 26.2 | 12.3 | 25.3   | 18.3 | 14.4 | 11.5   | 7.9                | -2.1 | 13.8   |
| 270°    | 79.0 | 18.6 | 87.3   | 40.7 | 22.0 | 37.3   | 38.4               | -3.3 | 50.0   |
| 315°    | 12.2 | 6.0  | 8.6    | 12.9 | 13.1 | 10.2   | -0.6               | -7.0 | -1.6   |
| Overall | 30.3 | 12.6 | 31.4   | 20.8 | 13.1 | 17.9   | 9.5                | -0.5 | 13.5   |

Table 8: Minimum audible angle (MAA) performance for each subject. The data compares the performance of the pinna-imitating microphone setting (PI) with the omnidirectional microphone setting (OMNI).

| Subject | OMNI |      |        | NM   |      |        | $\Delta$ (OMNI-NM) |      |        |
|---------|------|------|--------|------|------|--------|--------------------|------|--------|
|         | Mean | SD   | Median | Mean | SD   | Median | Mean               | SD   | Median |
| CI01    | 29.7 | 29.4 | 14.9   | 10.2 | 10.3 | 5.7    | 19.5               | 19.1 | 9.3    |
| CI02    | 11.8 | 11.0 | 7.9    | 9.9  | 8.5  | 6.3    | 1.8                | 2.4  | 1.6    |
| CI03    | 32.0 | 36.5 | 19.2   | 22.9 | 26.6 | 13.3   | 9.1                | 10.0 | 5.9    |
| CI04    | 34.0 | 36.0 | 16.5   | 27.2 | 19.2 | 29.4   | 6.8                | 16.8 | -12.9  |
| CI05    | 30.4 | 33.5 | 17.4   | 36.1 | 31.0 | 33.7   | -5.7               | 2.5  | -16.3  |
| CI06    | 36.9 | 38.3 | 22.6   | 17.0 | 15.0 | 10.2   | 20.0               | 23.3 | 12.4   |
| CI07    | 36.0 | 34.2 | 22.4   | 22.8 | 13.4 | 19.0   | 13.2               | 20.8 | 3.4    |
| CI08    | 27.4 | 24.2 | 24.4   | 22.2 | 17.3 | 21.9   | 5.2                | 6.9  | 2.5    |
| CI09    | 35.2 | 35.1 | 25.8   | 23.1 | 16.5 | 24.0   | 12.1               | 18.6 | 1.8    |
| CI10    | 26.7 | 36.9 | 9.5    | 22.2 | 20.9 | 14.7   | 4.6                | 16.0 | -5.2   |
| CI11    | 34.5 | 30.5 | 24.6   | 21.0 | 11.6 | 25.6   | 13.5               | 18.9 | -0.9   |
| CI12    | 29.3 | 29.8 | 14.0   | 14.8 | 15.0 | 8.1    | 14.5               | 14.7 | 5.9    |
| Overall | 30.3 | 7.6  | 18.3   | 20.8 | 6.6  | 16.8   | 9.5                | 1.0  | 1.5    |



## 2.1 Sound source tracking with touch pad

### 2.1.1 Steady trajectory

Table 9: Results on subject level for the sound source tracking with touch pad test and the steady trajectory. The data shows the performance with the omnidirectional microphone setting (OMNI). The columns of the table describe the following metrics: Position tracking error ( $RMSE_{\theta}$ ), front-back confusion (FBC) score, percentage of correctly perceived movement direction, velocity tracking error ( $RMSE_{\omega}$ ), number of re-localizations of sound sources (ROS), duration of ROSs ( $\Delta t_{ROS}$ ), improvement after a ROS ( $\Delta RMSE_{\theta, ROS}$ ) and reaction time after a change in direction (CID) of the stimulus ( $\Delta t_{CID}$ ).

| Subject | $RMSE_{\theta}$ (degree angle) | FBC-Score (%) | Correct direction (%) | $RMSE_{\omega}$ (°/s) | $N_{ROS}$ | $\Delta t_{ROS}$ (ms) | $\Delta RMSE_{\theta, ROS}$ (degree angle) | $\Delta t_{CID}$ (ms) |
|---------|--------------------------------|---------------|-----------------------|-----------------------|-----------|-----------------------|--------------------------------------------|-----------------------|
| C101    | 50.1                           | 13.1          | 86.3                  | 2.9                   | 11        | 810                   | 34.2                                       | 6441                  |
| C102    | 47.3                           | 11.3          | 80.7                  | 1.5                   | 5         | 446                   | 12.1                                       | 7160                  |
| C103    | 57.4                           | 17.5          | 60.2                  | 2.9                   | 16        | 511                   | 20.6                                       | 2334                  |
| C104    | 81.2                           | 10.4          | 41.8                  | 2.3                   | 0         | NaN                   | NaN                                        | No CID perceived      |
| C105    | 86.5                           | 33.9          | 57.0                  | 2.4                   | 7         | 663                   | 16.6                                       | No CID perceived      |
| C106    | 63.0                           | 28.6          | 53.9                  | 4.8                   | 10        | 1302                  | 49.9                                       | No CID perceived      |
| C107    | 66.9                           | 20.9          | 64.2                  | 3.5                   | 8         | 766                   | 49.4                                       | No CID perceived      |
| C108    | 51.6                           | 12.8          | 65.9                  | 4.4                   | 15        | 730                   | 36.1                                       | 3043                  |
| C109    | 65.3                           | 24.9          | 57.6                  | 4.2                   | 15        | 768                   | 23.3                                       | 5566                  |
| C110    | 59.9                           | 21.3          | 62.4                  | 2.2                   | 6         | 279                   | 16.0                                       | 5562                  |
| C111    | 70.9                           | 27.6          | 52.3                  | 3.0                   | 12        | 943                   | 33.9                                       | Wrong mov. dir.       |
| C112    | 48.1                           | 9.1           | 81.6                  | 4.6                   | 6         | 713                   | 43.5                                       | 8800                  |
| Mean    | 62.3                           | 19.3          | 63.6                  | 3.2                   | 9         | 721                   | 30.5                                       | 5558                  |
| SD      | 12.7                           | 8.2           | 13.2                  | 1.1                   | 5         | 268                   | 13.6                                       | 2257                  |
| Median  | 61.4                           | 19.2          | 61.3                  | 2.9                   | 9         | 730                   | 33.9                                       | 5566                  |

Table 10: Results on subject level for the sound source tracking with touch pad test and the steady trajectory. The data shows the performance with the pinna-imitating microphone setting (PI). The columns of the table describe the following metrics: Position tracking error ( $RMSE_{\theta}$ ), front-back confusion (FBC) score, percentage of correctly perceived movement direction, velocity tracking error ( $RMSE_{\omega}$ ), number of re-localizations of sound sources (ROS), duration of ROSs ( $\Delta t_{ROS}$ ), improvement after a ROS ( $\Delta RMSE_{\theta,ROS}$ ) and reaction time after a change in direction (CID) of the stimulus ( $\Delta t_{CID}$ ).

| Subject | $RMSE_{\theta}$ (degree angle) | FBC-Score (%) | Correct direction (%) | $RMSE_{\omega}$ (°/s) | $N_{ROS}$ | $\Delta t_{ROS}$ (ms) | $\Delta RMSE_{\theta,ROS}$ (degree angle) | $\Delta t_{CID}$ (ms) |
|---------|--------------------------------|---------------|-----------------------|-----------------------|-----------|-----------------------|-------------------------------------------|-----------------------|
| CI01    | 62.8                           | 13.2          | 78.6                  | 3.7                   | 5         | 892                   | 41.8                                      | 12740                 |
| CI02    | 48.5                           | 14.5          | 73.1                  | 3.2                   | 9         | 1012                  | 54.5                                      | No CID perceived      |
| CI03    | 72.4                           | 30.1          | 63.4                  | 2.7                   | 12        | 743                   | 27.6                                      | No CID perceived      |
| CI04    | 83.9                           | 13.5          | 43.1                  | 2.5                   | 6         | 403                   | 12.5                                      | No CID perceived      |
| CI05    | 69.8                           | 25.5          | 56.3                  | 2.6                   | 7         | 744                   | 23.2                                      | No CID perceived      |
| CI06    | 53.5                           | 17.9          | 66.5                  | 2.7                   | 8         | 1069                  | 43.1                                      | 18311                 |
| CI07    | 24.8                           | 5.2           | 87.2                  | 1.6                   | 5         | 780                   | 26.5                                      | 2692                  |
| CI08    | 82.7                           | 10.8          | 59.5                  | 5.6                   | 11        | 608                   | 67.8                                      | No CID perceived      |
| CI09    | 39.7                           | 5.5           | 84.3                  | 2.0                   | 13        | 572                   | 21.9                                      | 5387                  |
| CI10    | 54.6                           | 17.9          | 88.0                  | 1.9                   | 6         | 666                   | 16.6                                      | 2693                  |
| CI11    | 56.5                           | 13.9          | 93.9                  | 1.3                   | 3         | 992                   | 26.0                                      | 4130                  |
| CI12    | 17.5                           | 2.2           | 96.8                  | 1.0                   | 2         | 186                   | 3.1                                       | 3234                  |
| Mean    | 55.6                           | 14.2          | 74.2                  | 2.6                   | 7         | 722                   | 30.4                                      | 7027                  |
| SD      | 20.9                           | 8.1           | 16.7                  | 1.2                   | 3         | 259                   | 18.3                                      | 6097                  |
| Median  | 55.5                           | 13.7          | 75.8                  | 2.5                   | 7         | 743                   | 26.3                                      | 4130                  |

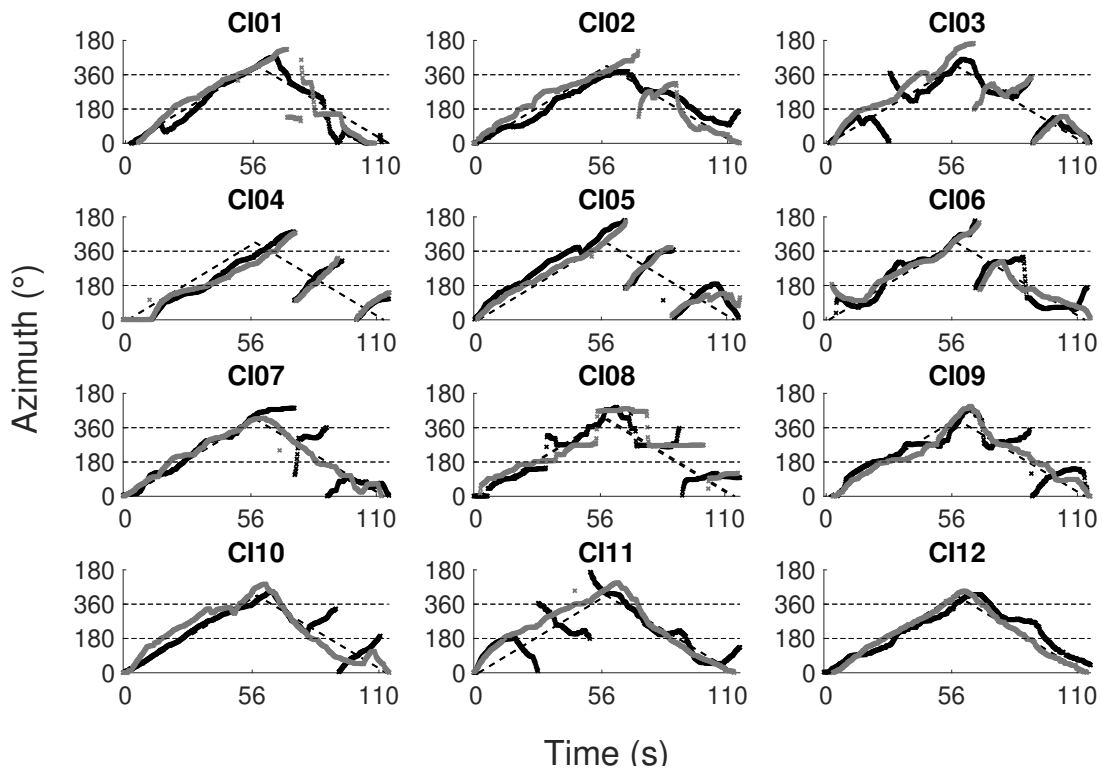

Figure 5: User and stimulus trajectories for the sound source tracking with touch pad test in the steady trajectory. The black line indicates the perceived trajectories with the omnidirectional microphone setting (OMNI). The performance with the pinna-imitating microphone setting (PI) is shown by the grey line. The underlying dotted line shows the trajectory of the stimulus. User inputs which result in errors bigger than  $180^\circ$  were set to the corresponding position closer to the stimulus.

## 2.1.2 Alternating trajectory

Table 11: Results on subject level for the sound source tracking with touch pad test and the alternating trajectory. The data shows the performance with the omnidirectional microphone setting (OMNI). The columns of the table describe the following metrics: Position tracking error ( $\text{RMSE}_{\vartheta}$ ), percentage of correctly perceived movement direction, velocity tracking error ( $\text{RMSE}_{\omega}$ ), number of re-localizations of sound sources (ROS), duration of ROSs ( $\Delta t_{\text{ros}}$ ), improvement after a ROS ( $\Delta \text{RMSE}_{\vartheta, \text{ros}}$ ).

| Subject | $\text{RMSE}_{\vartheta}$ (degree angle) | FBC Score (%) | Correct direction (%) | $\text{RMSE}_{\omega}$ ( $^{\circ}/s$ ) | $N_{\text{ros}}$ | $\Delta t_{\text{ros}}$ (ms) | $\Delta \text{RMSE}_{\vartheta, \text{ros}}$ (degree angle) |
|---------|------------------------------------------|---------------|-----------------------|-----------------------------------------|------------------|------------------------------|-------------------------------------------------------------|
| CI01    | 83.9                                     | 26.5          | 46.6                  | 4.7                                     | 64               | 934                          | 38.1                                                        |
| CI02    | 25.1                                     | 2.6           | 54.9                  | 1.6                                     | 6                | 408                          | 7.9                                                         |
| CI03    | 65.5                                     | 27.6          | 46.0                  | 3.0                                     | 35               | 820                          | 20.4                                                        |
| CI04    | 78.9                                     | 0.0           | 47.1                  | 2.5                                     | 13               | 956                          | 37.4                                                        |
| CI05    | 74.2                                     | 33.2          | 56.4                  | 3.3                                     | 34               | 1103                         | 36.5                                                        |
| CI06    | 50.8                                     | 16.2          | 57.6                  | 2.1                                     | 9                | 845                          | 31.2                                                        |
| CI07    | 72.1                                     | 27.2          | 53.7                  | 3.1                                     | 29               | 793                          | 29.8                                                        |
| CI08    | 64.7                                     | 20.0          | 50.3                  | 2.9                                     | 8                | 851                          | 37.4                                                        |
| CI09    | 75.2                                     | 34.0          | 52.5                  | 2.2                                     | 17               | 513                          | 24.6                                                        |
| CI10    | 74.1                                     | 38.3          | 43.3                  | 3.5                                     | 33               | 1014                         | 34.9                                                        |
| CI11    | 74.0                                     | 23.6          | 47.7                  | 3.7                                     | 38               | 1304                         | 42.4                                                        |
| CI12    | 60.5                                     | 19.8          | 48.7                  | 2.1                                     | 9                | 756                          | 42.7                                                        |
| Mean    | 66.6                                     | 22.4          | 50.4                  | 2.9                                     | 25               | 858                          | 31.9                                                        |
| SD      | 15.8                                     | 11.7          | 4.6                   | 0.8                                     | 17               | 241                          | 10.1                                                        |
| Median  | 73.0                                     | 25.1          | 49.5                  | 2.9                                     | 23               | 848                          | 35.7                                                        |

Table 12: Results on subject level for the sound source tracking with touch pad test and the alternating trajectory. The data shows the performance with the pinna-imitating microphone setting (PI). The columns of the table describe the following metrics: Position tracking error ( $\text{RMSE}_{\theta}$ ), percentage of correctly perceived movement direction, velocity tracking error ( $\text{RMSE}_{\omega}$ ), number of re-localizations of sound sources (ROS), duration of ROSs ( $\Delta t_{\text{ROS}}$ ), improvement after a ROS ( $\Delta \text{RMSE}_{\theta, \text{ROS}}$ ).

| Subject | $\text{RMSE}_{\theta}$ (degree angle) | FBC Score (%) | Correct direction (%) | $\text{RMSE}_{\omega}$ ( $^{\circ}/\text{s}$ ) | $N_{\text{ROS}}$ | $\Delta t_{\text{ROS}}$ (ms) | $\Delta \text{RMSE}_{\theta, \text{ROS}}$ (degree angle) |
|---------|---------------------------------------|---------------|-----------------------|------------------------------------------------|------------------|------------------------------|----------------------------------------------------------|
| C101    | 73.2                                  | 20.6          | 44.9                  | 4.4                                            | 51               | 916                          | 42.6                                                     |
| C102    | 32.8                                  | 2.4           | 56.2                  | 1.7                                            | 8                | 546                          | 17.7                                                     |
| C103    | 64.0                                  | 27.0          | 49.8                  | 3.5                                            | 35               | 797                          | 36.6                                                     |
| C104    | 82.6                                  | 0.0           | 57.8                  | 2.5                                            | 20               | 757                          | 30.8                                                     |
| C105    | 68.6                                  | 30.1          | 46.1                  | 4.0                                            | 39               | 1093                         | 34.8                                                     |
| C106    | 48.0                                  | 14.6          | 53.9                  | 1.7                                            | 3                | 821                          | 33.3                                                     |
| C107    | 63.5                                  | 14.4          | 52.5                  | 3.3                                            | 31               | 886                          | 40.4                                                     |
| C108    | 87.8                                  | 27.2          | 48.6                  | 3.7                                            | 20               | 876                          | 50.0                                                     |
| C109    | 32.3                                  | 6.6           | 50.4                  | 1.8                                            | 6                | 598                          | 22.5                                                     |
| C110    | 60.9                                  | 17.9          | 49.2                  | 3.2                                            | 40               | 1045                         | 32.7                                                     |
| C111    | 79.8                                  | 22.1          | 49.2                  | 2.5                                            | 19               | 982                          | 25.6                                                     |
| C112    | 32.5                                  | 9.3           | 52.3                  | 2.7                                            | 20               | 493                          | 35.6                                                     |
| Mean    | 60.5                                  | 16.0          | 50.9                  | 2.9                                            | 24               | 817                          | 33.5                                                     |
| SD      | 19.9                                  | 9.9           | 3.8                   | 0.9                                            | 15               | 192                          | 8.9                                                      |
| Median  | 63.8                                  | 16.3          | 50.1                  | 2.9                                            | 20               | 848                          | 34.1                                                     |

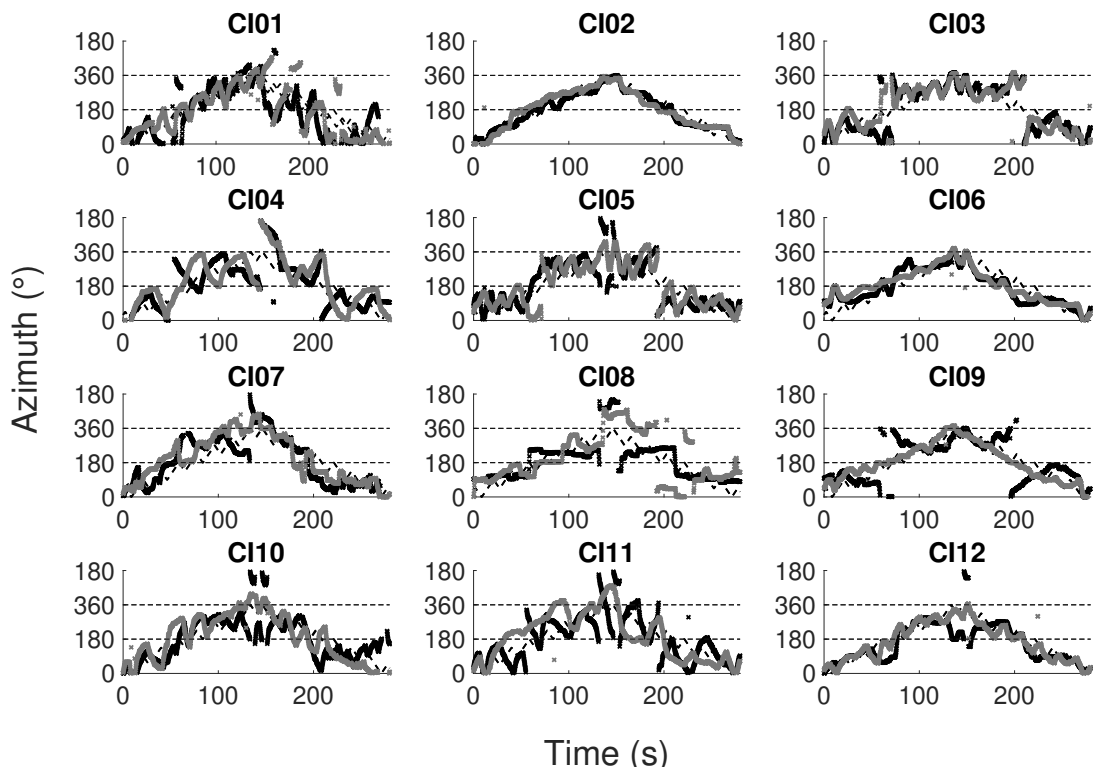

Figure 6: User and stimulus trajectories for the sound source tracking with touch pad test in the alternating trajectory. The black line indicates the perceived trajectories with the omnidirectional microphone setting (OMNI). The performance with the pinna-imitating microphone setting (PI) is shown by the grey line. The underlying dotted line shows the trajectory of the stimulus. For reasons of illustrativity, user inputs which result in errors bigger than  $180^\circ$ , were set to the corresponding position closer to the stimulus.

Table 13: Root mean square tracking errors ( $RMSE_{\theta}$ ) for specific movement directions (clockwise (CW) or counter-clockwise (CCW)) or hemifields (left, right, frontal, dorsal). The data refers to the omnidirectional microphone setting (OMNI) in the alternating trajectory and is given in degree angle. Hemifields have an angular span of 180-degree angle each.

| Subject | CW   | CCW  | Left | Right | Dorsal | Frontal |
|---------|------|------|------|-------|--------|---------|
| CI01    | 85.5 | 82.1 | 68.7 | 96.6  | 88.8   | 77.6    |
| CI02    | 24.6 | 25.3 | 22.7 | 27.4  | 25.8   | 24.3    |
| CI03    | 65.4 | 65.7 | 64.9 | 67.4  | 83.7   | 32.9    |
| CI04    | 76.8 | 80.9 | 86.4 | 70.5  | 72.4   | 85.7    |
| CI05    | 73.0 | 75.1 | 87.9 | 58.6  | 77.7   | 69.1    |
| CI06    | 54.0 | 47.1 | 53.1 | 48.8  | 51.1   | 50.1    |
| CI07    | 72.5 | 71.6 | 69.8 | 74.7  | 81.4   | 58.9    |
| CI08    | 60.3 | 68.8 | 76.6 | 50.8  | 42.7   | 82.8    |
| CI09    | 75.6 | 74.5 | 76.3 | 75.2  | 91.1   | 50.1    |
| CI10    | 66.8 | 80.3 | 80.3 | 67.7  | 63.9   | 83.5    |
| CI11    | 66.1 | 81.1 | 77.7 | 70.8  | 78.2   | 68.2    |
| CI12    | 54.3 | 65.9 | 72.6 | 46.3  | 49.3   | 70.6    |
| Mean    | 64.6 | 68.2 | 69.8 | 62.9  | 67.2   | 62.8    |
| SD      | 15.6 | 16.7 | 17.6 | 17.8  | 20.6   | 20.1    |
| Median  | 66.5 | 73.1 | 74.5 | 67.5  | 75.0   | 68.7    |

Table 14: Root mean square tracking errors ( $RMSE_{\theta}$  (degree angle)) for specific movement directions (clockwise (CW) or counter-clockwise (CCW)) or hemifields (left, right, frontal, dorsal). The data refers to the pinna-imitating microphone setting (PI) in the alternating trajectory. Hemifields have an angular span of 180-degree angle each.

| Subject | CW   | CCW  | Left | Right | Dorsal | Frontal |
|---------|------|------|------|-------|--------|---------|
| CI01    | 64.1 | 81.2 | 79.8 | 66.3  | 82.6   | 60.8    |
| CI02    | 33.6 | 31.7 | 30.2 | 35.3  | 37.4   | 26.7    |
| CI03    | 62.0 | 65.9 | 60.7 | 67.6  | 74.9   | 47.7    |
| CI04    | 74.2 | 90.1 | 90.0 | 75.1  | 78.7   | 86.5    |
| CI05    | 71.8 | 64.8 | 69.5 | 68.3  | 81.7   | 49.1    |
| CI06    | 52.8 | 42.1 | 38.8 | 55.3  | 41.6   | 54.3    |
| CI07    | 64.2 | 62.8 | 71.2 | 55.4  | 72.4   | 51.8    |
| CI08    | 76.7 | 97.6 | 96.6 | 78.9  | 94.5   | 79.2    |
| CI09    | 29.6 | 34.4 | 25.5 | 37.8  | 27.3   | 37.4    |
| CI10    | 60.1 | 61.2 | 54.4 | 66.7  | 69.6   | 48.9    |
| CI11    | 83.4 | 75.9 | 87.5 | 72.5  | 91.0   | 64.5    |
| CI12    | 35.0 | 29.5 | 30.8 | 34.2  | 36.0   | 27.9    |
| Mean    | 59.0 | 61.4 | 61.2 | 59.5  | 65.6   | 52.9    |
| SD      | 17.8 | 22.9 | 25.2 | 15.9  | 23.5   | 18.2    |
| Median  | 63.1 | 63.8 | 65.1 | 66.5  | 73.7   | 50.4    |

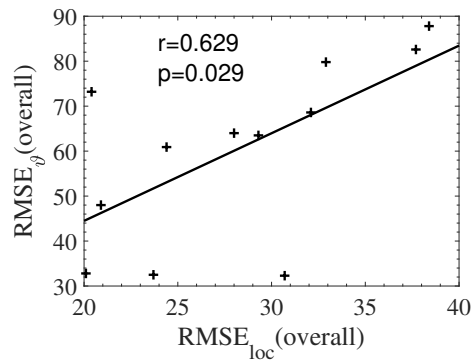

Figure 7: The data on the  $x$  axis represents the root mean square localization error ( $RMSE_{LOC}$ ) of the static sound source localization test. On the  $y$  axis, the root mean square tracking error ( $RMSE_{\theta}$ ) of the sound source tracking with touchpad in the alternating trajectory is shown. The data refers to the pinna-imitating microphone setting (PI).
